# Supplementary material
Source: PubMed Central journal article supplement (PMC7039248)

## Supporting Information

### **A Specific Proteome of Hippocampal Regions CA2 and CA1 Reveals Proteins Linked to the Unique Physiology of Area CA2**

Kyle J. Gerber<sup>1†</sup>, Eric B. Dammer<sup>2,3†</sup>, Duc M. Duong<sup>2,3</sup>, Qiudong Deng<sup>2,3</sup>, Serena M. Dudek<sup>4</sup>, Nicholas T. Seyfried<sup>2,3,5</sup>, John R. Hepler<sup>1\*</sup>

#### ***Author Affiliations***

1 Department of Pharmacology and Chemical Biology, Emory University School of Medicine, Rollins Research Center, Atlanta, Georgia, USA.

2 Department of Biochemistry, Emory University School of Medicine, Atlanta, Georgia, USA.

3 Center for Neurodegenerative Disease, Emory University.

4 Neurobiology Laboratory, National Institute of Environmental Health Sciences, National Institutes of Health, Research Triangle Park, North Carolina, USA.

5 Department of Neurology, Emory University School of Medicine, Atlanta, Georgia, USA.

† Authors contributed equally.

\* Corresponding Author; Email address: jhepler@emory.edu.

#### **Table of Contents**

**Supplemental Figure 1** – Box plots showing differential expression between CA1 and CA2 for proteins included in chord plots

**Supplemental Figure 2** – Box plots showing differential expression between CA1 and CA2 across all mass spectrometry experiments for proteins included in chord plots

**Available separately:**

**Supplemental Table 1** – Meta-analysis of quantitative proteomics

**Supplemental Table 2** – Additional CA2 markers in TMT proteomics

**Supplemental Table 3** – Information on dissected mouse samples

**Supplemental Table 4** – Significance of differentially expressed proteins in modules

## Supplemental Figure 1 – Box plots showing differential expression between CA1 and CA2 for proteins included in chord plots

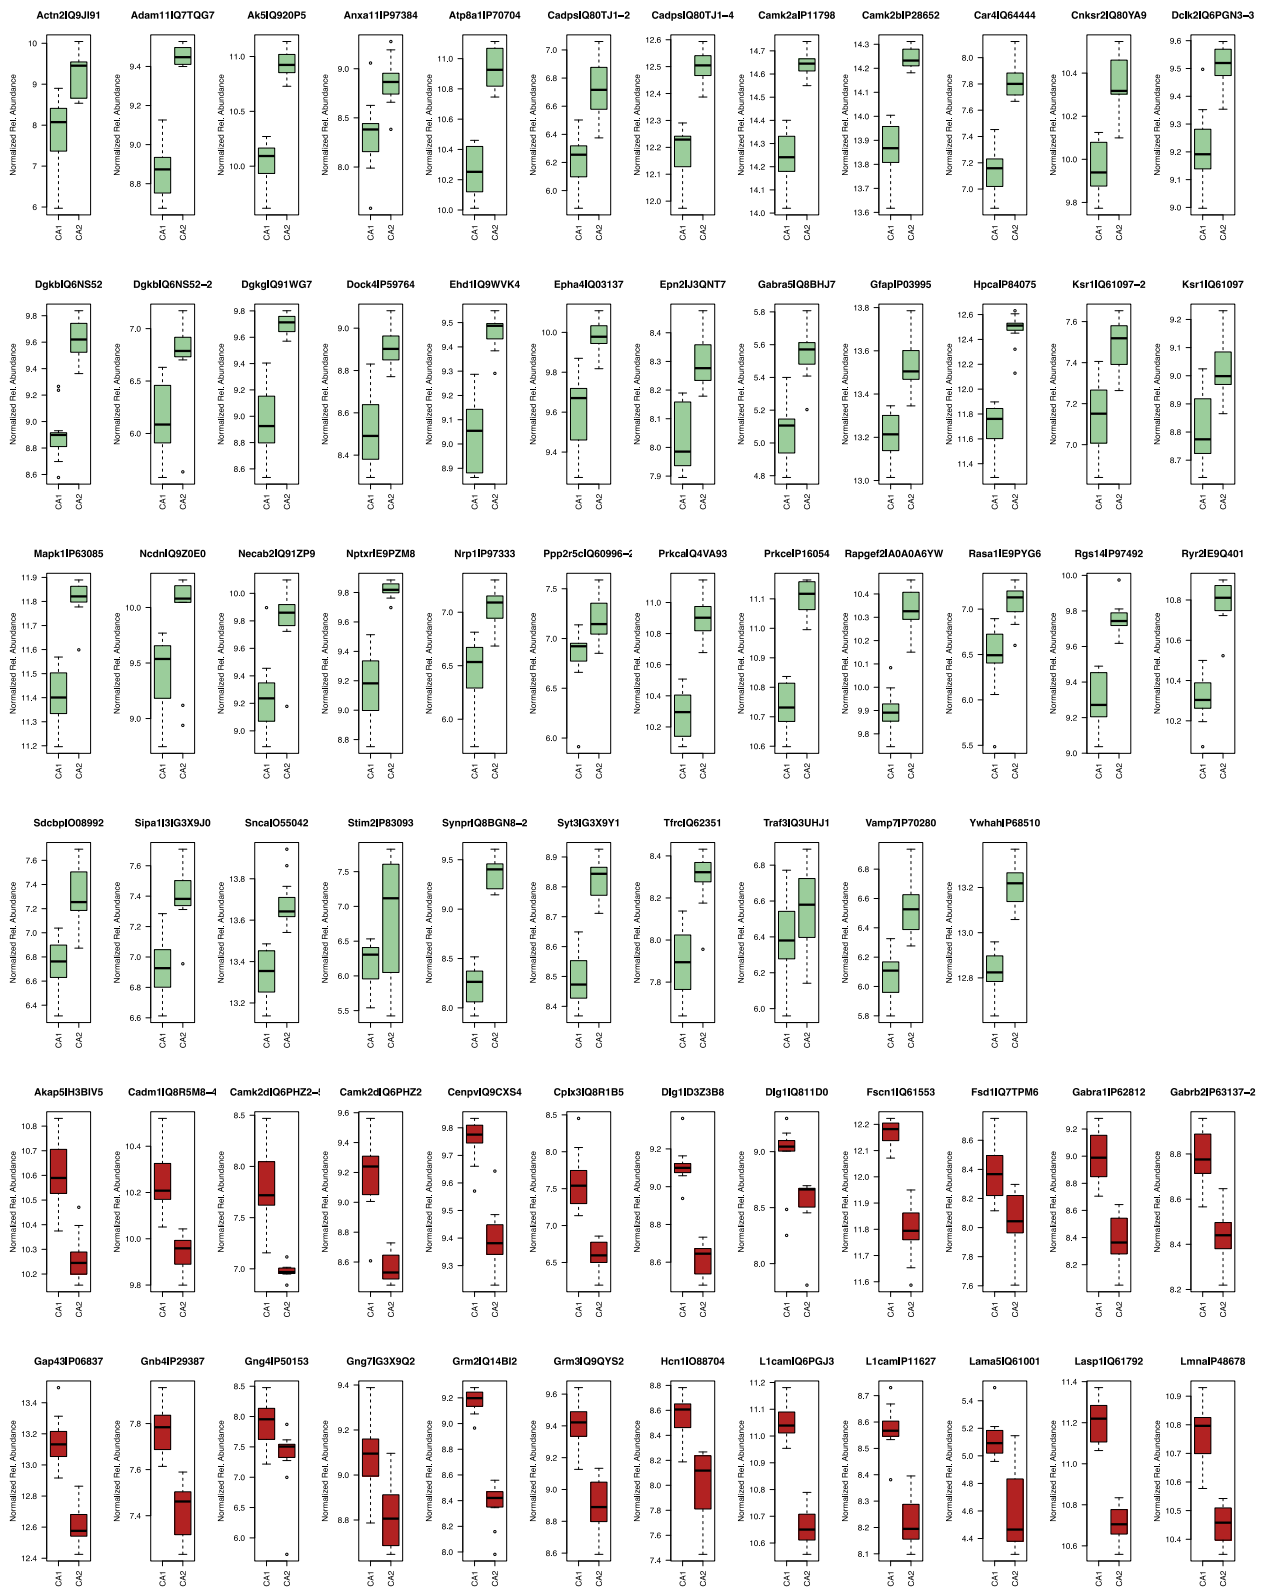

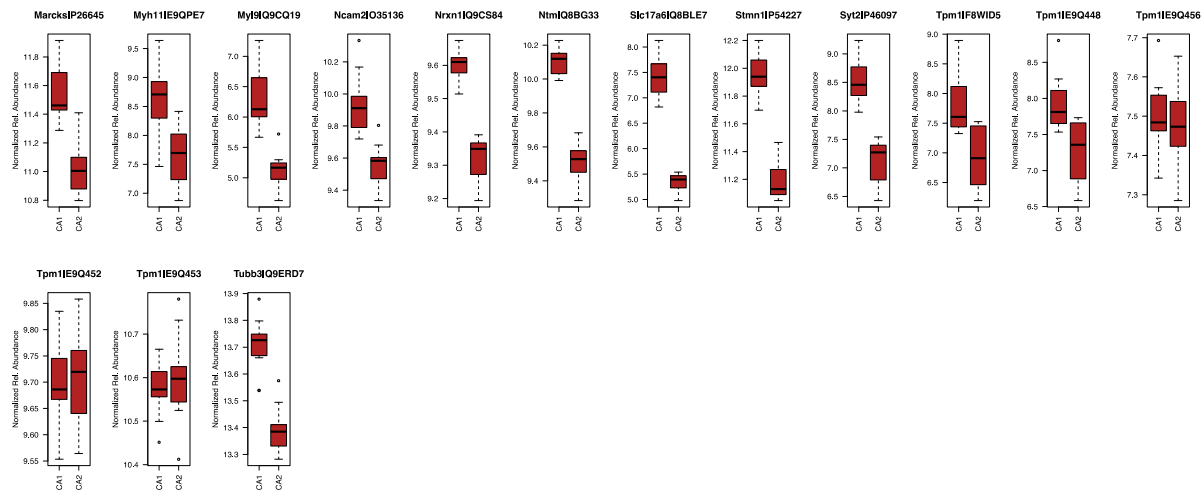

**Supplemental Figure 2** – Box plots showing differential expression between CA1 and CA2 across all mass spectrometry experiments for proteins included in chord plots

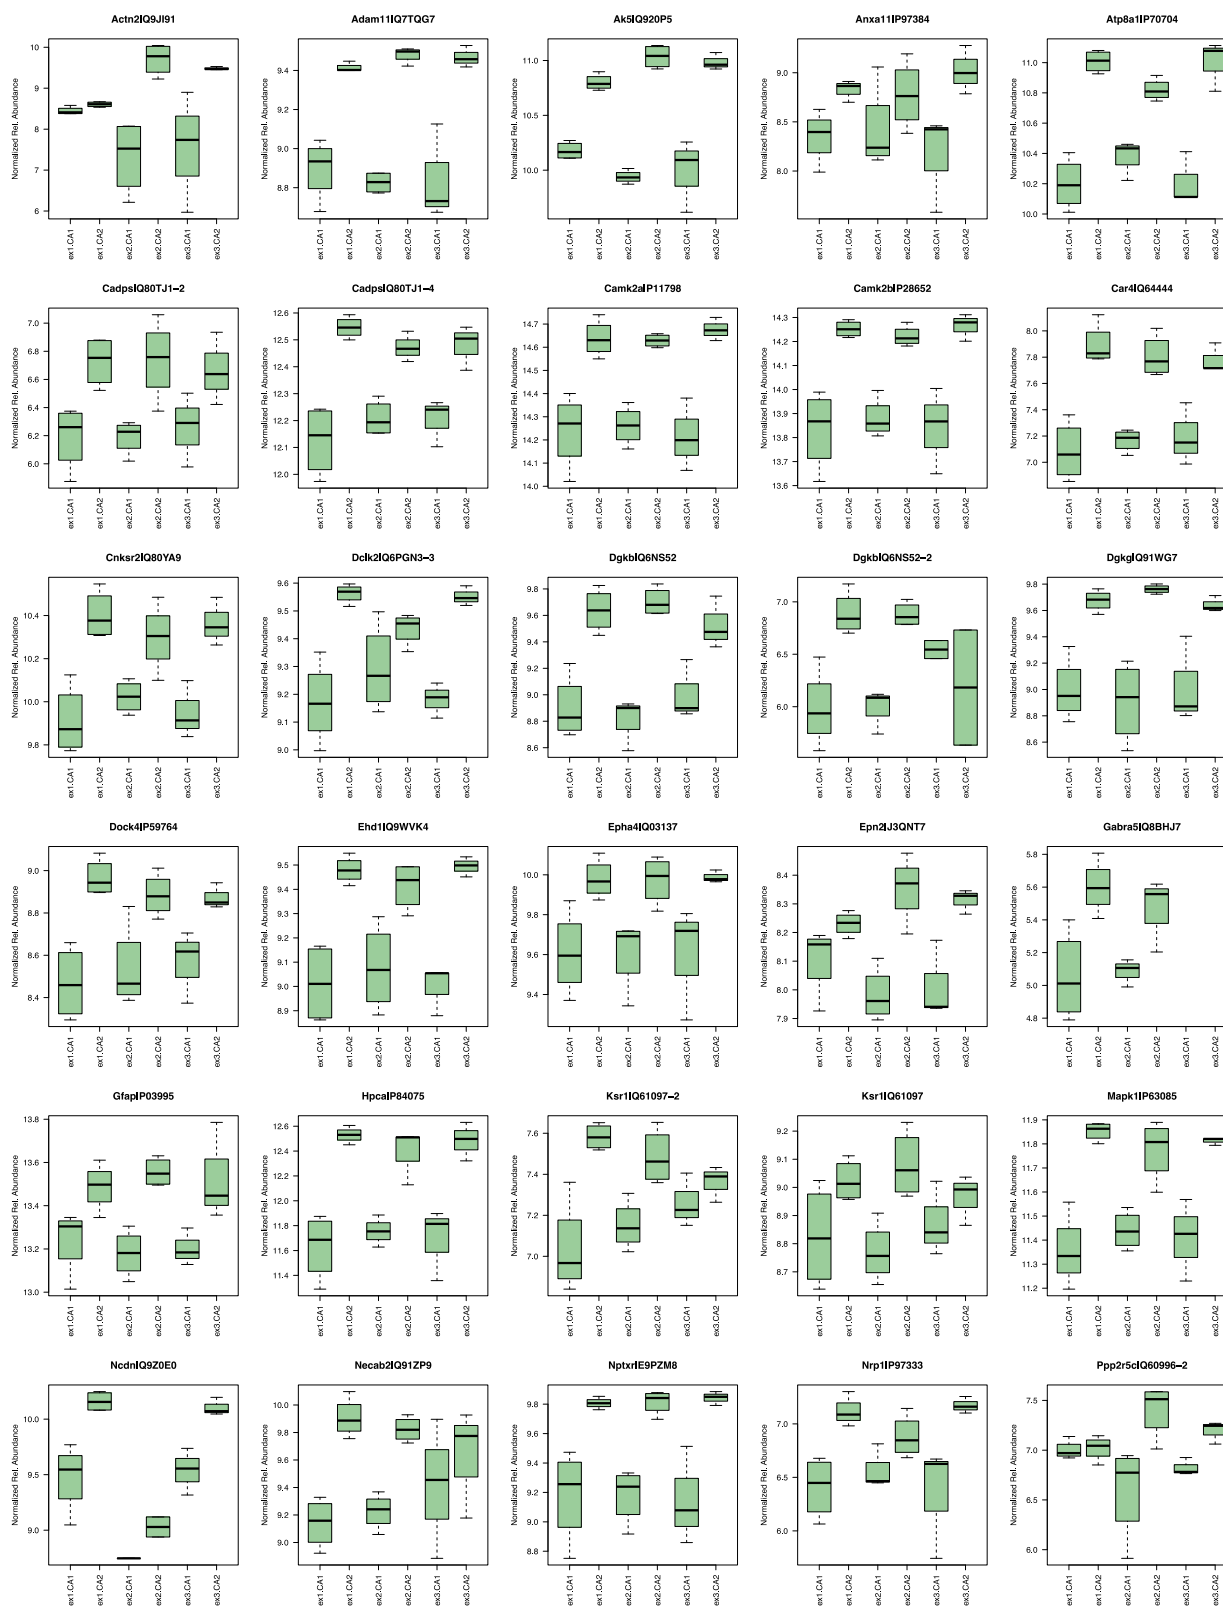

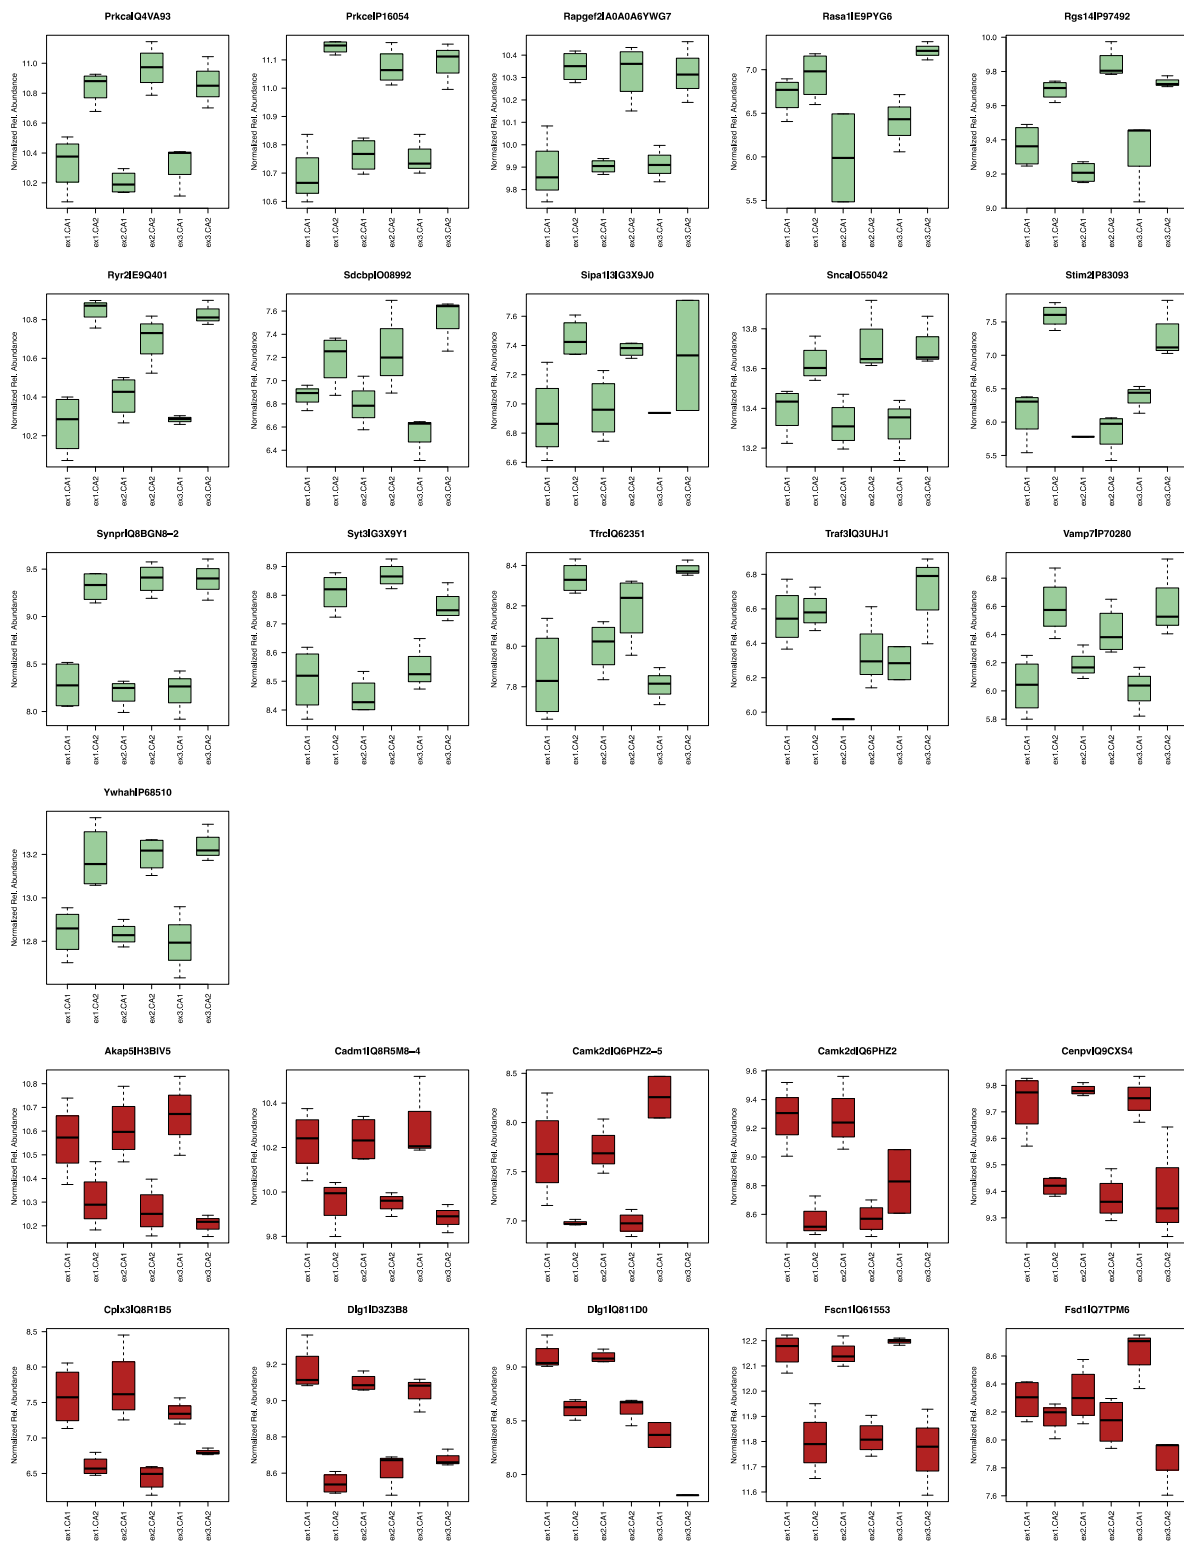

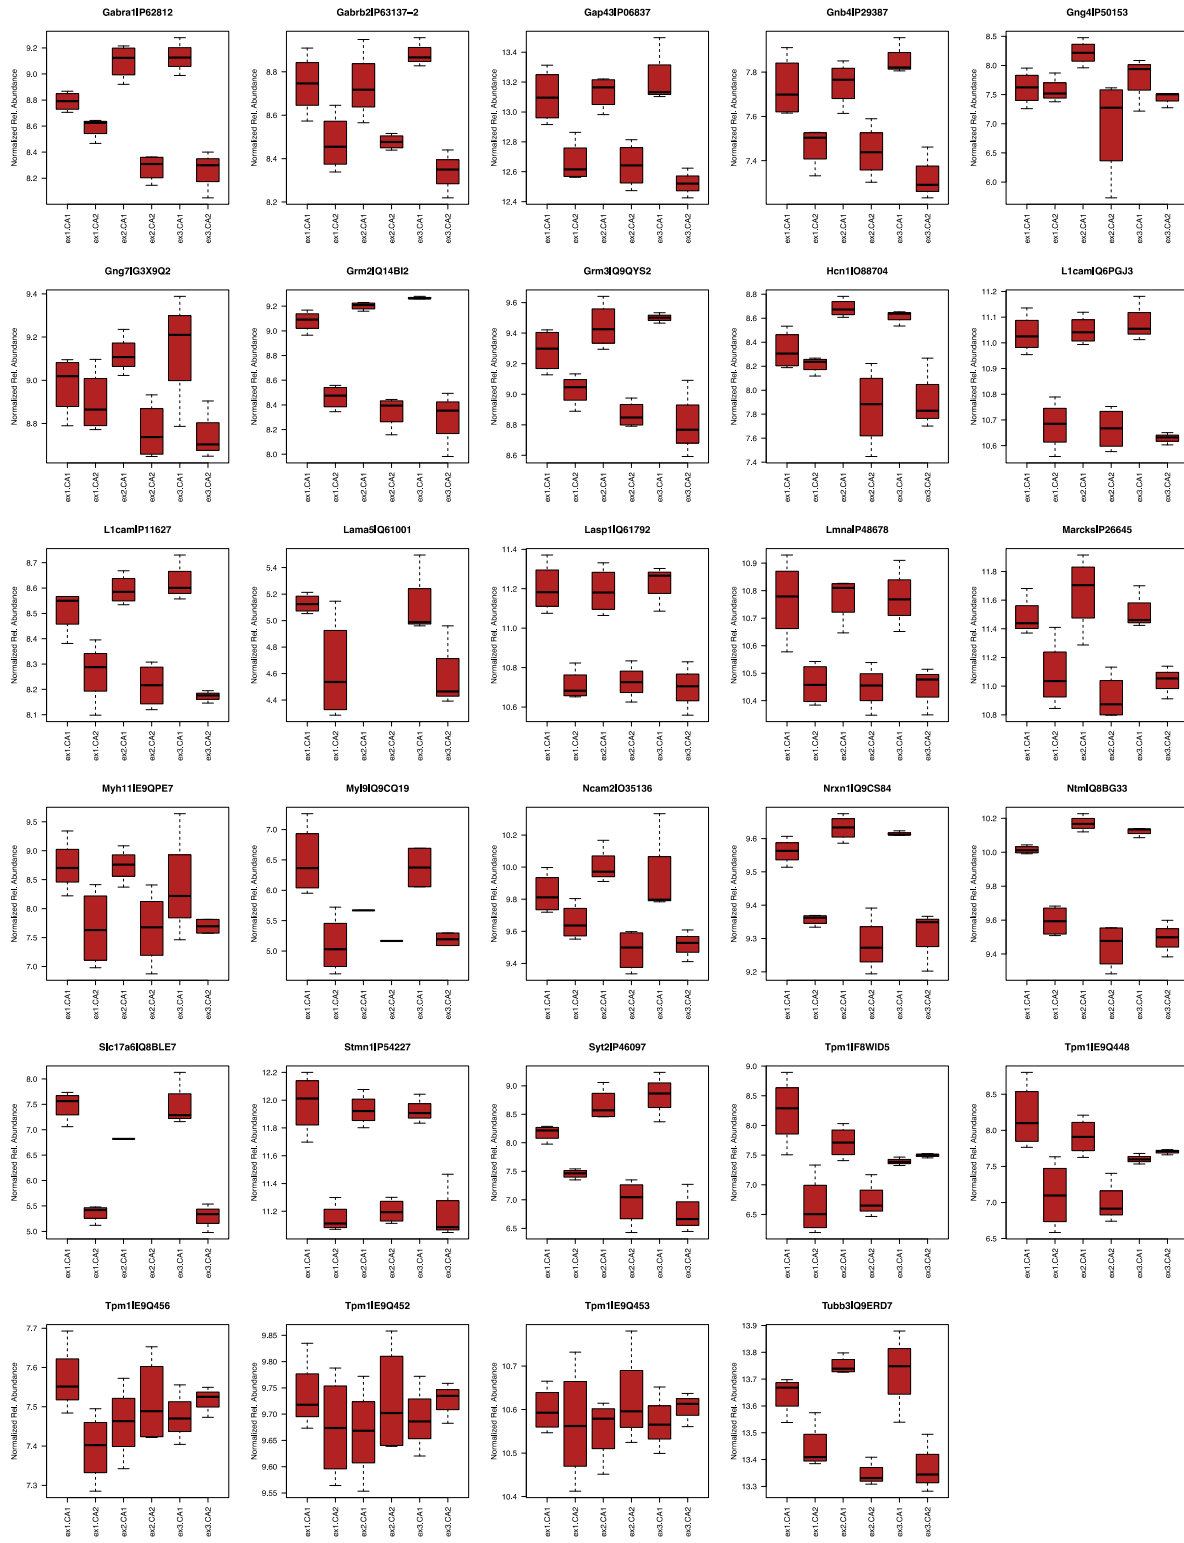

Supplement: NIHMS1555870-supplement-Gerber-Supplmental-JPR-2019.pdf [file NIHMS1555870-supplement-Gerber-Supplmental-JPR-2019.pdf]
